# Supplementary material for: Detection and quantification of trace technetium in the presence of molybdenum using laser-induced breakdown spectroscopy
Source: Royal Society of Chemistry journal article supplement (doi:10.1039/d5ja00319a), 2025-11-18

## Supplementary Information

### Detection and Quantification of Trace Technetium in the Presence of Molybdenum Using Laser-Induced Breakdown Spectroscopy

Hunter B. Andrews,<sup>1,\*</sup> Zachary Murphy,<sup>3</sup> Mauro Martinez,<sup>2,‡</sup> John Lucchi,<sup>2</sup>

Vasileios Anagnostopoulos,<sup>3</sup> Matthieu Baudalet<sup>2,3,4,5,\*</sup>

<sup>1</sup>Radioisotope Science and Technology Division, Oak Ridge National Laboratory, Oak Ridge, Tennessee, USA

<sup>2</sup>National Center of Forensic Science, University of Central Florida, Orlando, Florida, USA

<sup>3</sup>Chemistry Department, University of Central Florida, Orlando, Florida, USA

<sup>4</sup>CREOL—The College of Optics and Photonics, University of Central Florida, Orlando, Florida, USA

<sup>5</sup> Anthropology Department, University of Central Florida, Orlando, Florida, USA

<sup>‡</sup> Now at Department of Environmental Medicine and Public Health, Icahn School of Medicine at Mount Sinai, New York, New York, USA

\*Corresponding author: (H.B.A.) [andrewshb@ornl.gov](mailto:andrewshb@ornl.gov); (M.B.) [baudalet@ucf.edu](mailto:baudalet@ucf.edu)

#### Summary of contents:

- Sample preparation schematic
- Multichannel univariate calibration curves
- CZ ICCD univariate calibration curves
- Survey of Tc emissions at trace concentrations in Mo matrix
- Survey of concentrated Tc emissions on Si substrate

## Sample Preparation and PVA Conversion

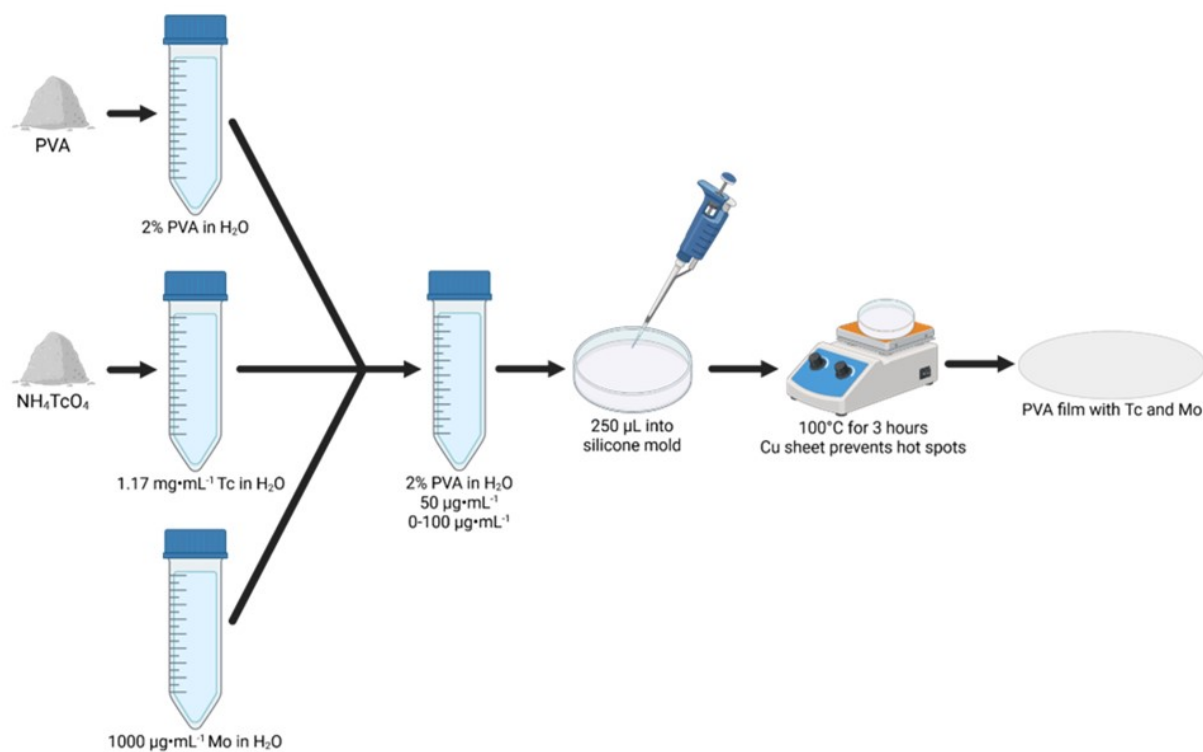

**Figure S1.** Diagram of the aqueous sample preparation and subsequent PVA film conversion.

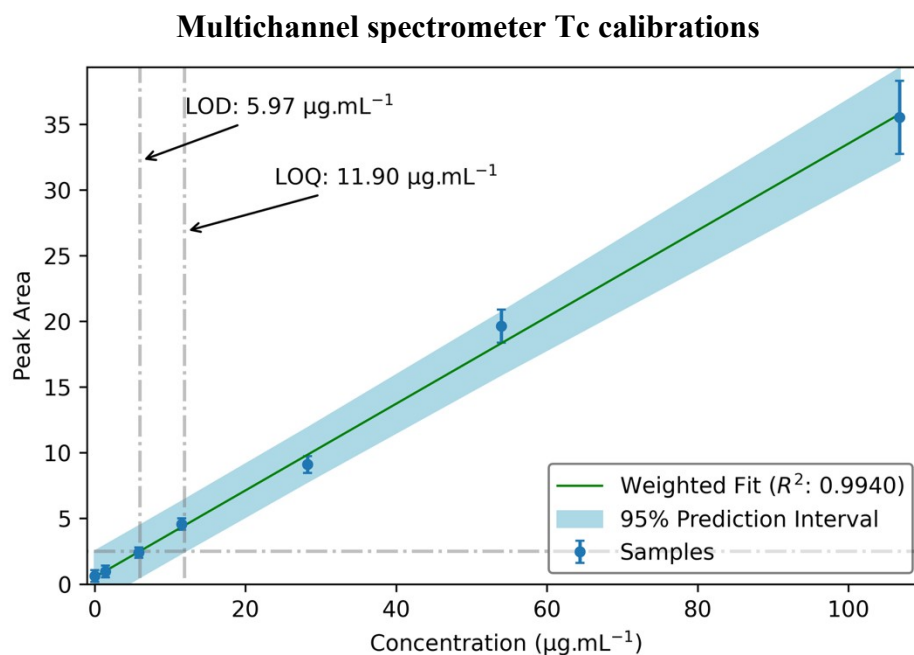

**Figure S2.** Tc calibration curve based on the 254.32 nm emission peak using the multichannel spectrometer.

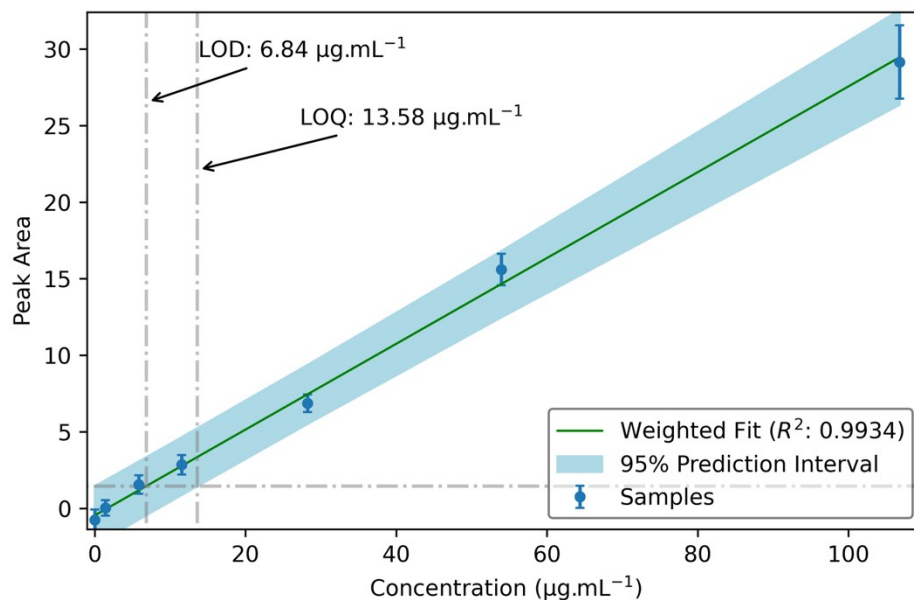

**Figure S3.** Tc calibration curve based on the 260.99 nm emission peak using the multichannel spectrometer.

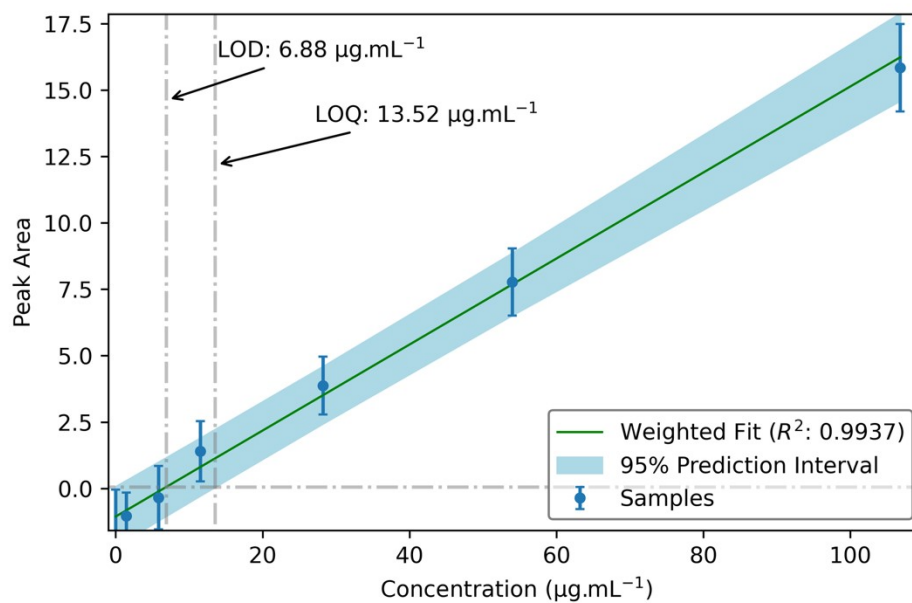

**Figure S4.** Tc calibration curve based on the 363.61 nm emission peak using the multichannel spectrometer.

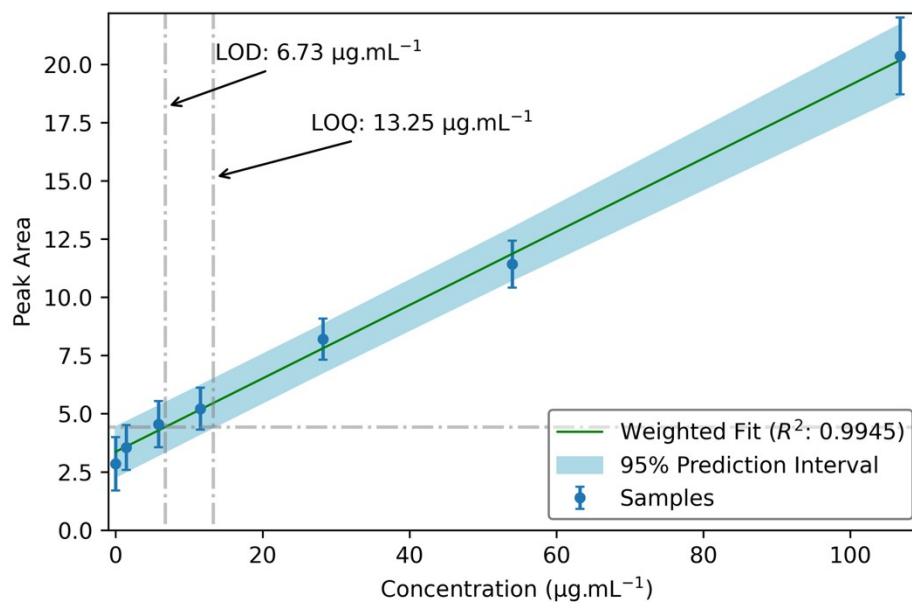

**Figure S5.** Tc calibration curve based on the 403.16 nm emission peak using the multichannel spectrometer.

### CZ ICCD spectrometer Tc calibrations

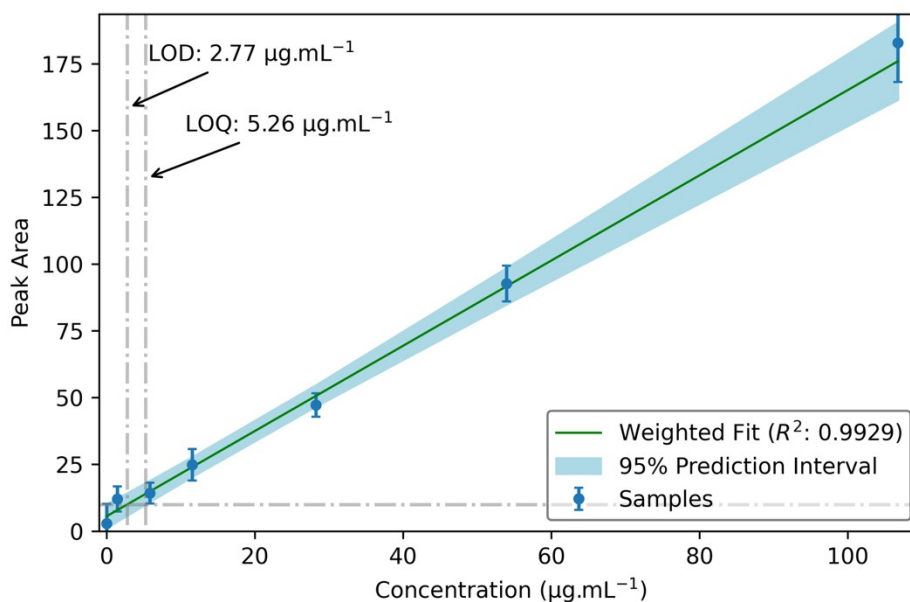

**Figure S6.** Tc calibration curve based on the 398.49 nm emission peak using the CZ ICCD spectrometer.

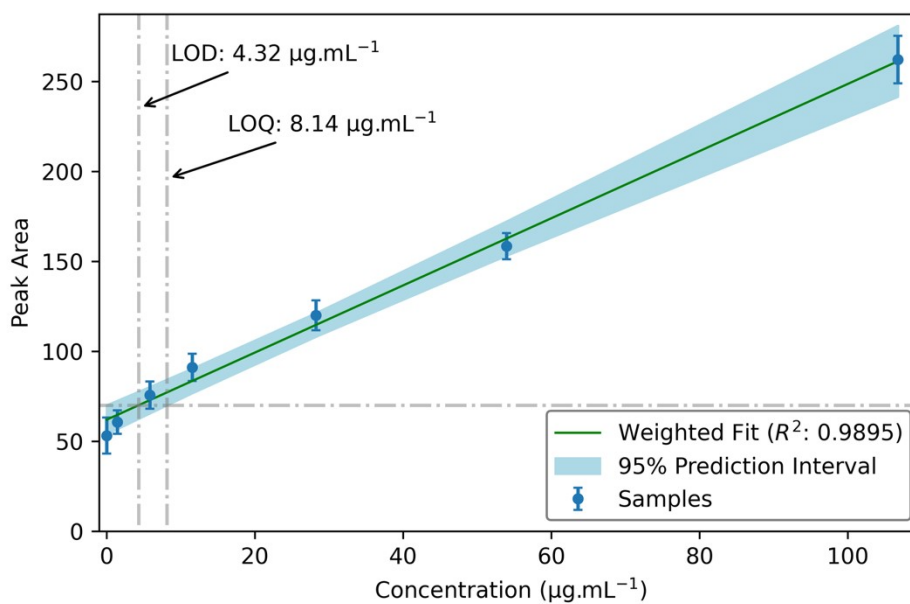

**Figure S7.** Tc calibration curve based on the 404.91 nm emission peak using the CZ ICCD spectrometer.

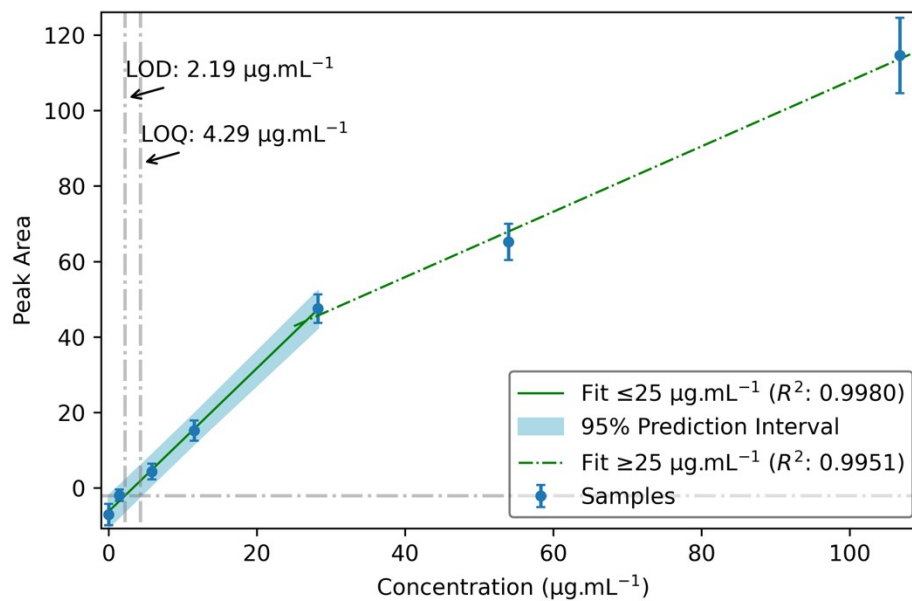

**Figure S8.** Tc calibration curve based on the 321.20 nm emission peak using the CZ ICCD spectrometer.

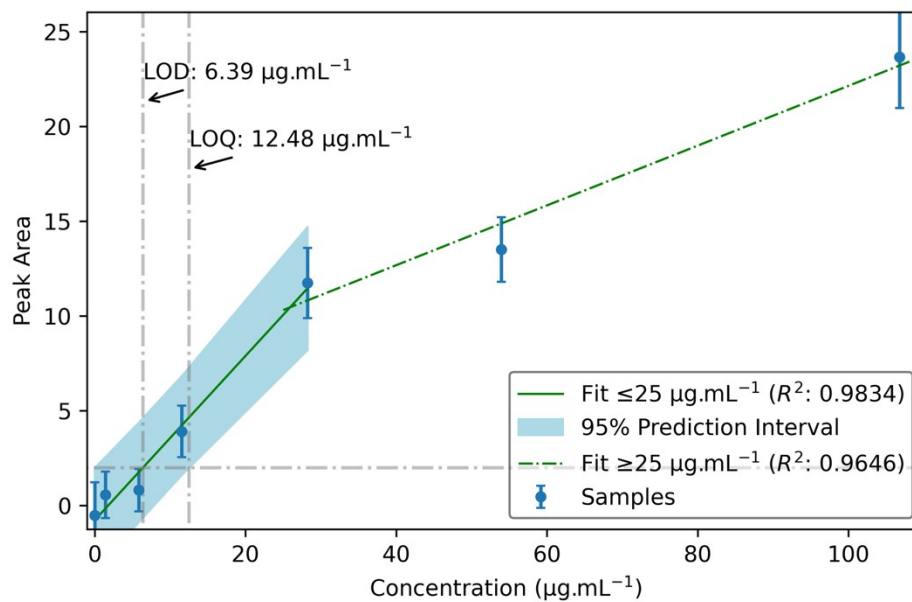

**Figure S9.** Tc calibration curve based on the 328.20 nm emission peak using the CZ ICCD spectrometer.

## Survey of Tc emissions at trace concentrations in Mo matrix

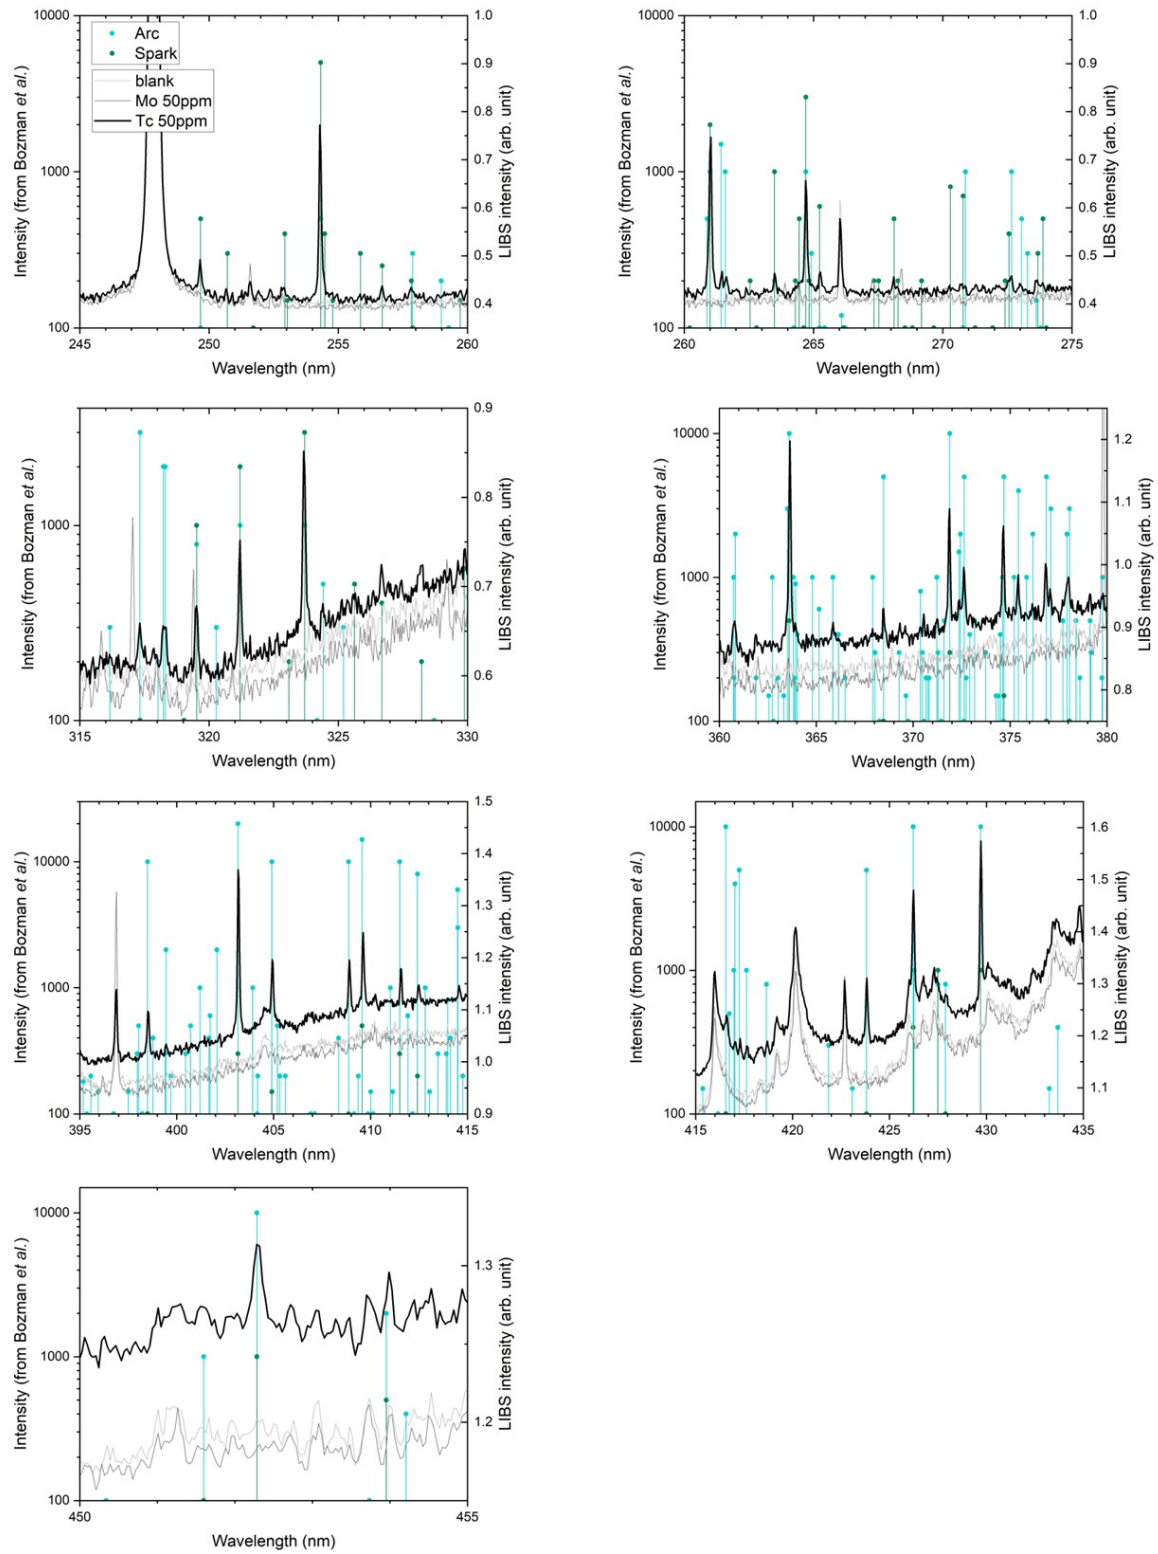



## Survey of concentrated Tc emissions on Si substrate

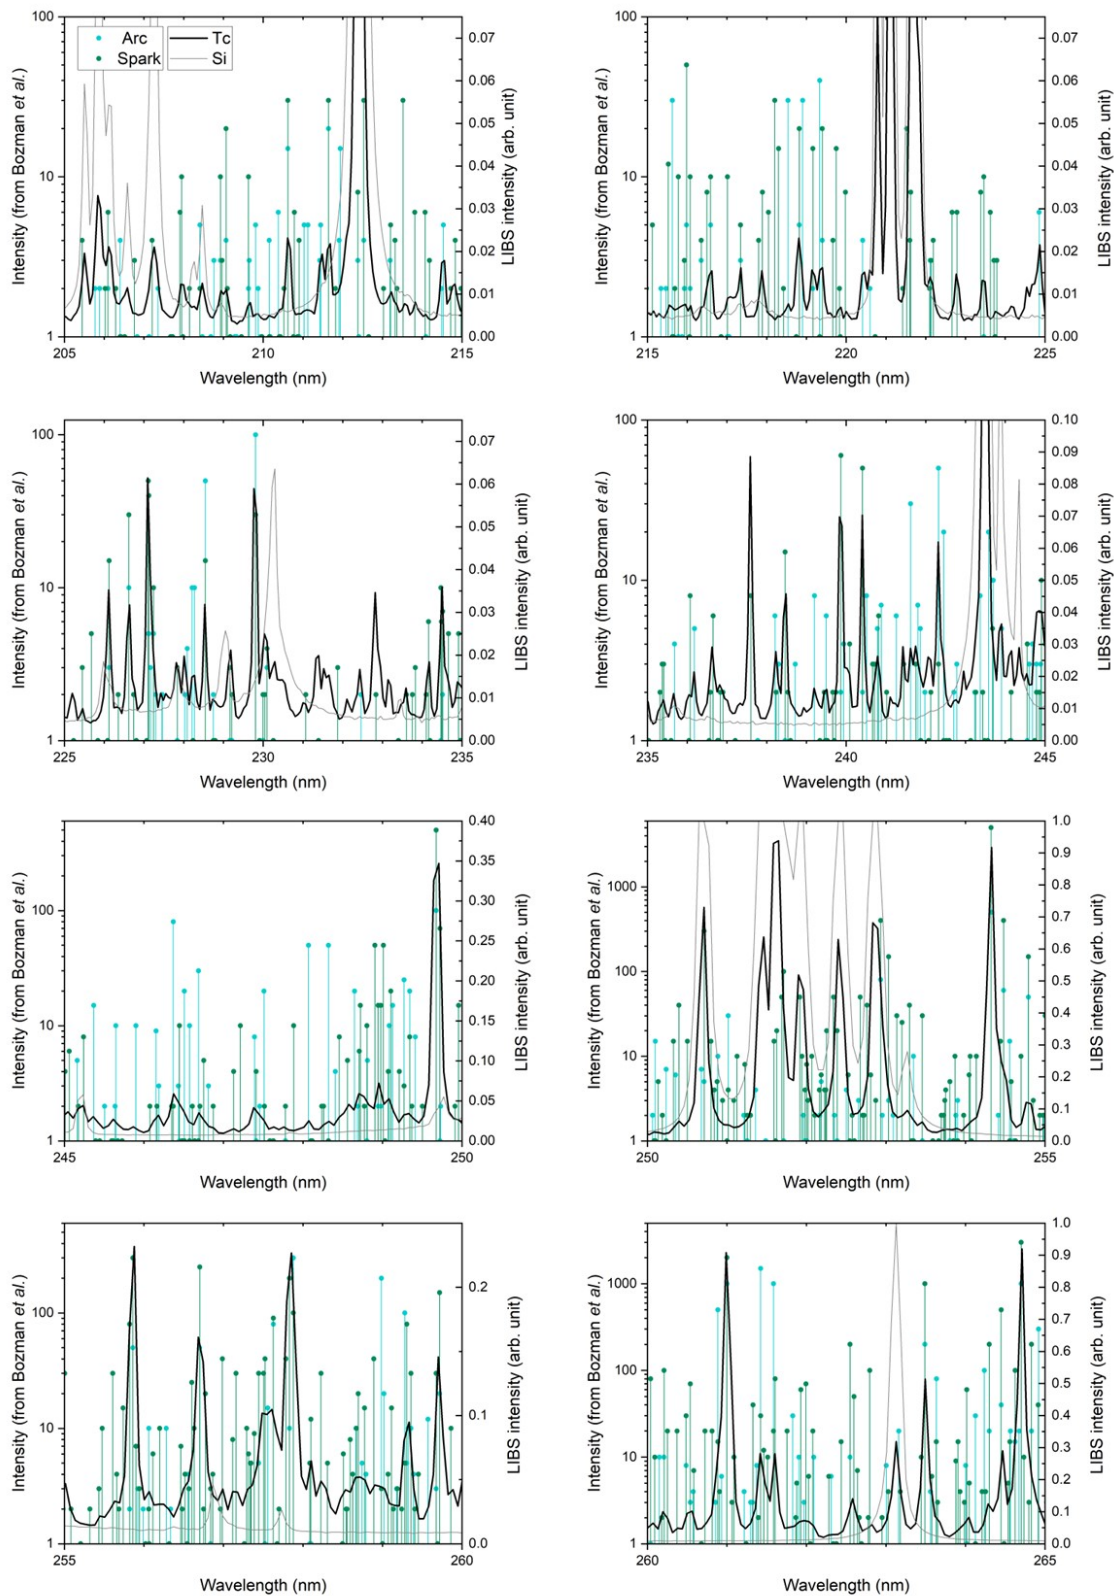



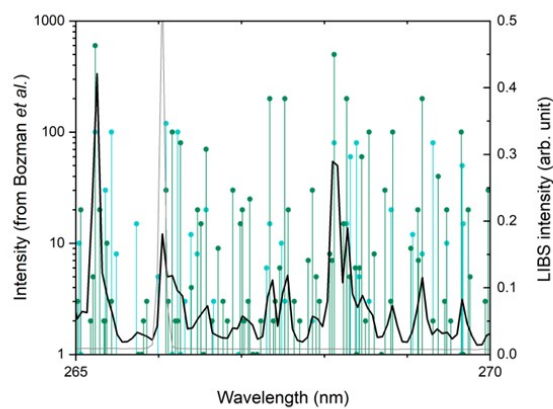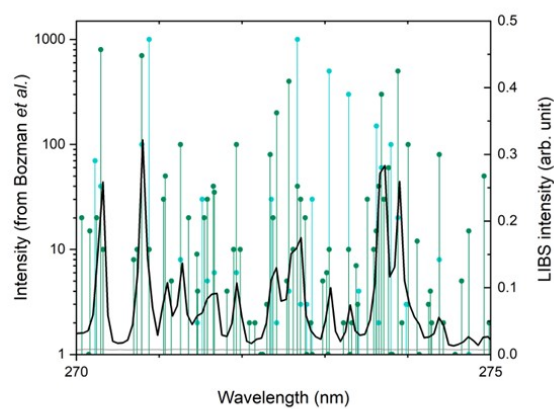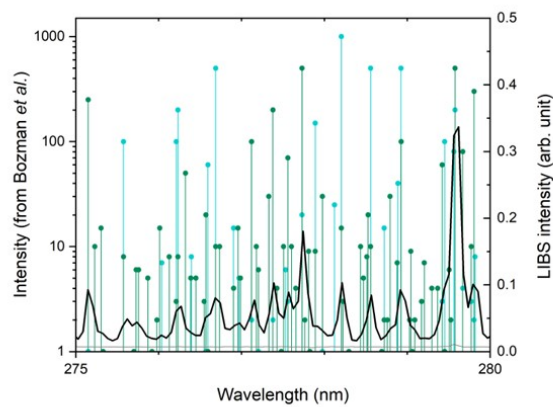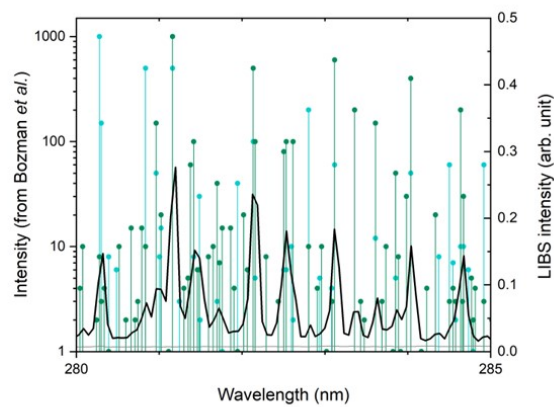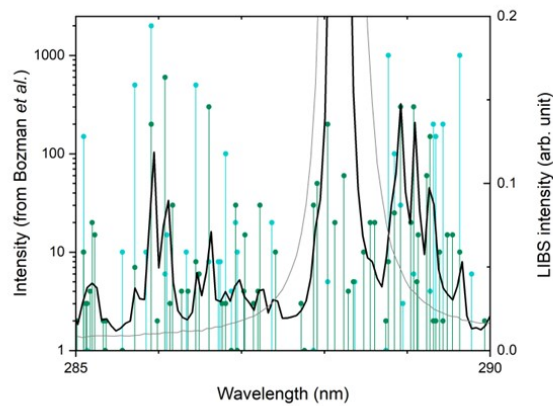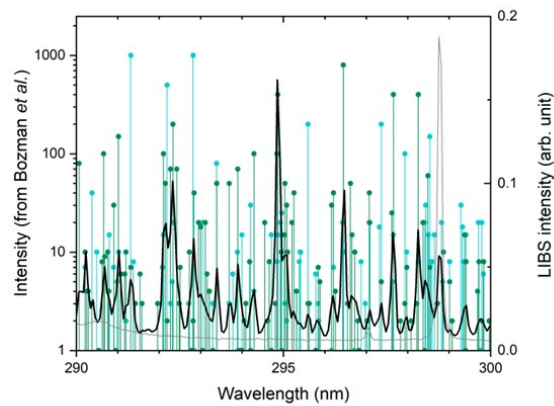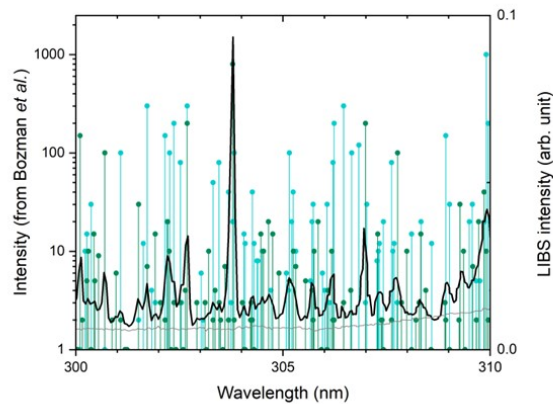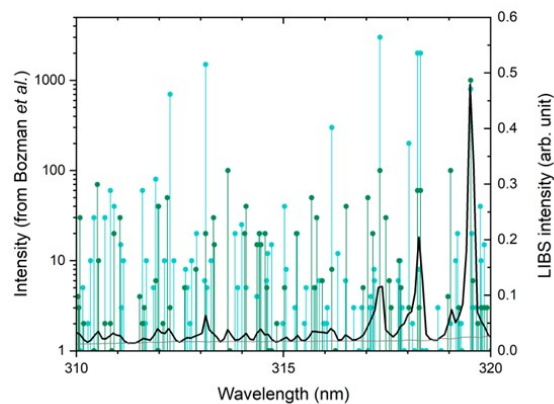

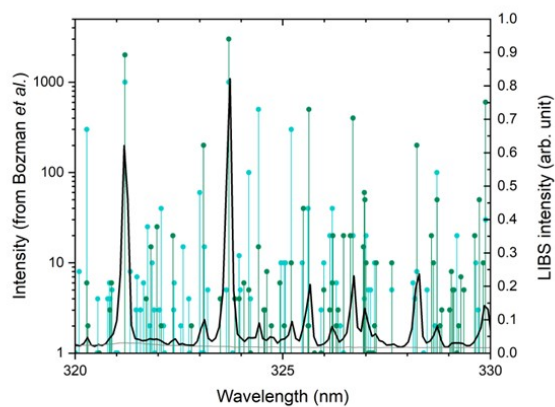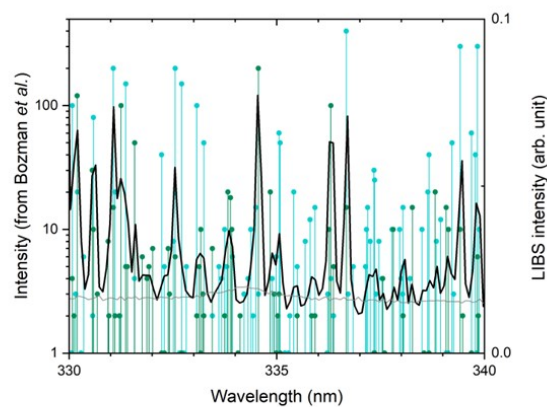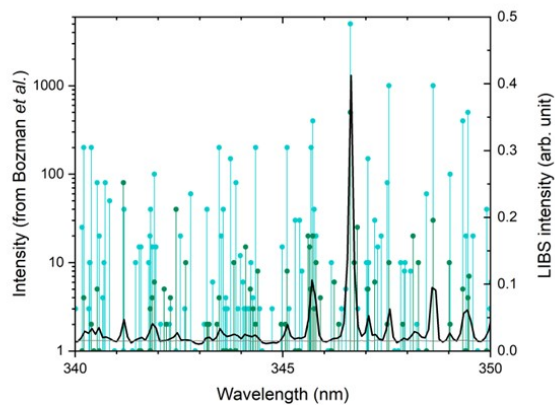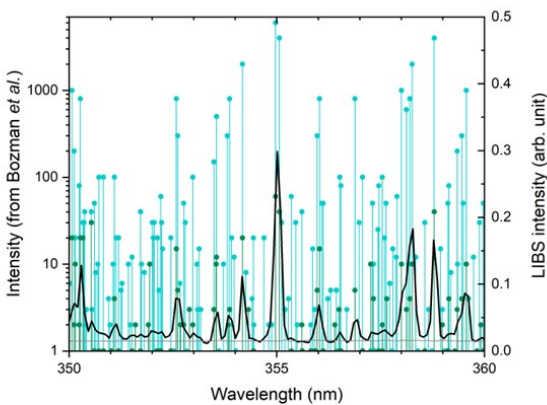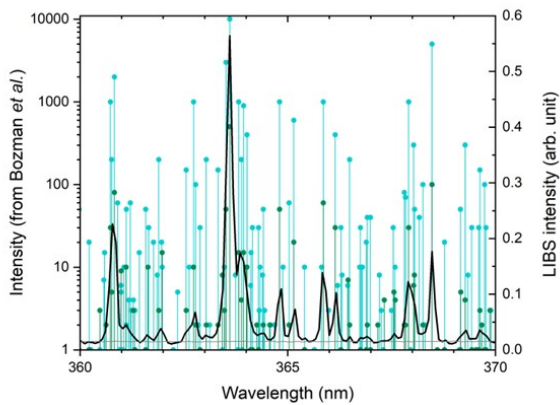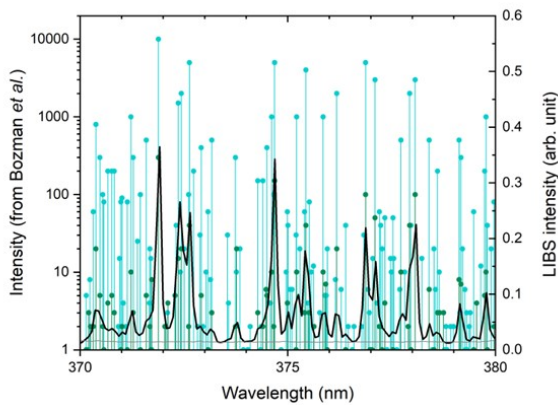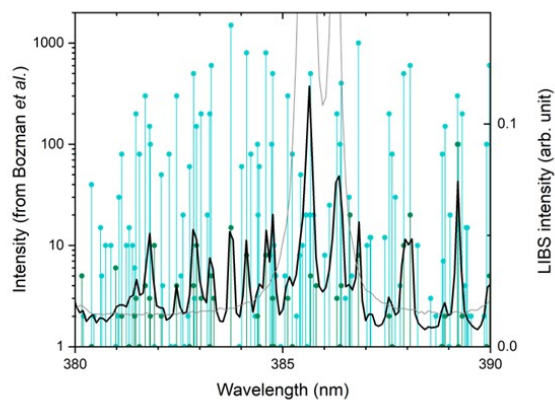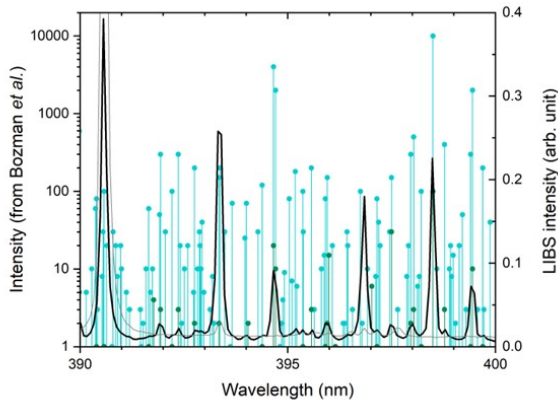

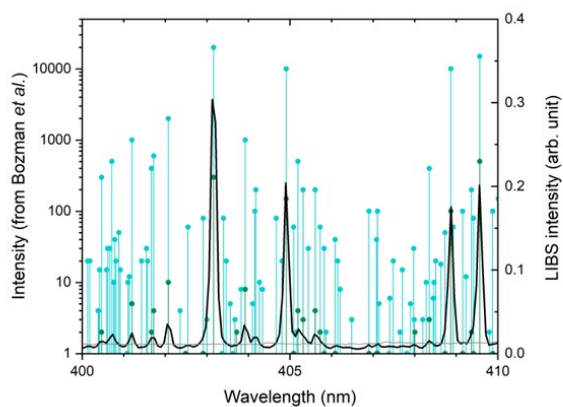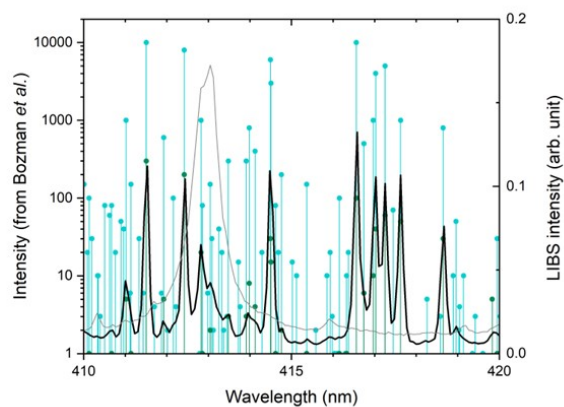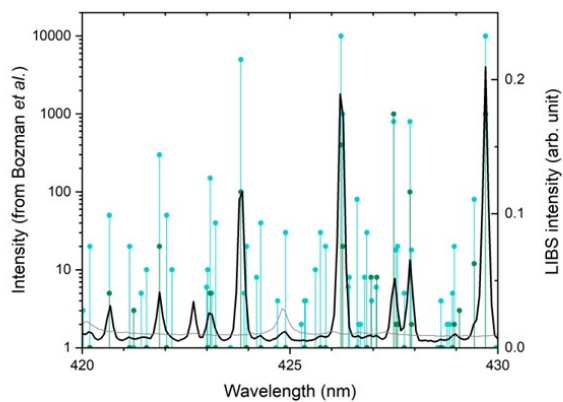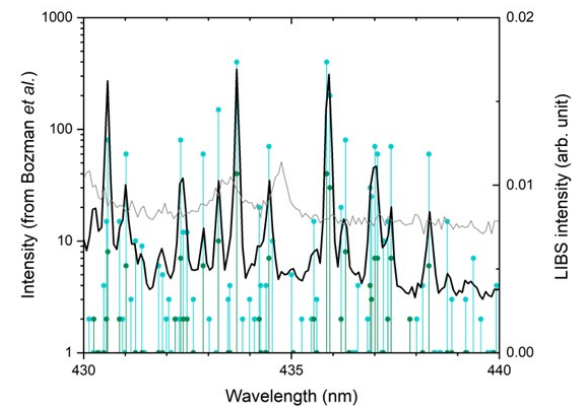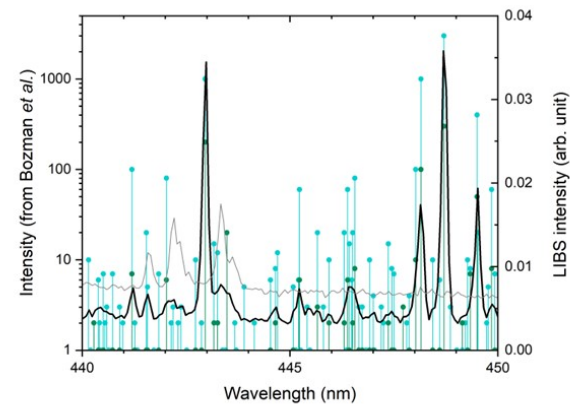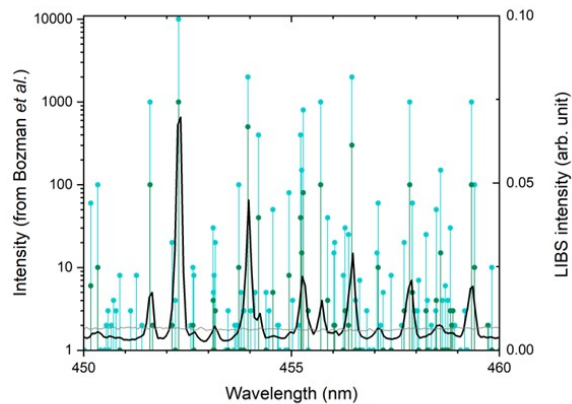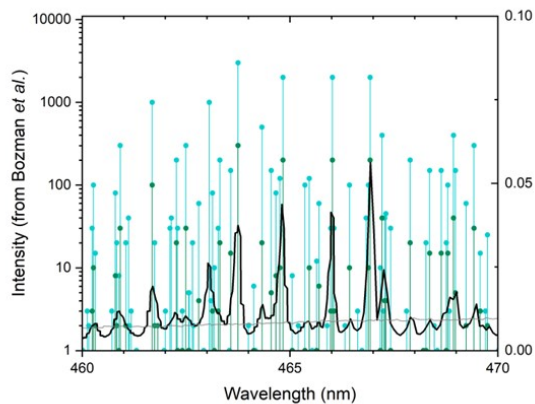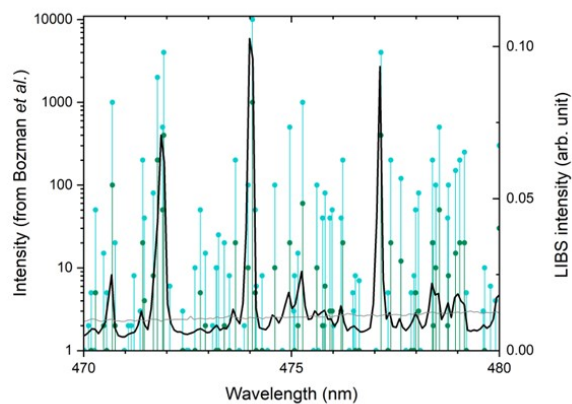



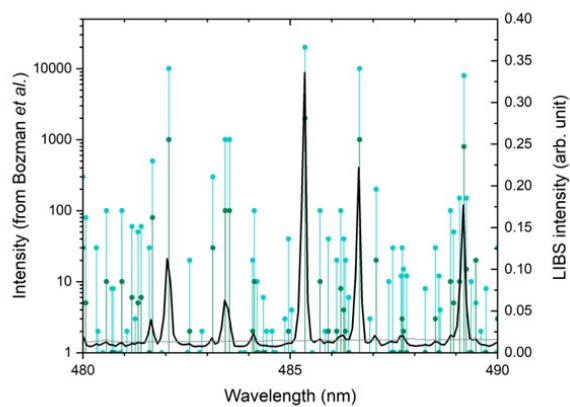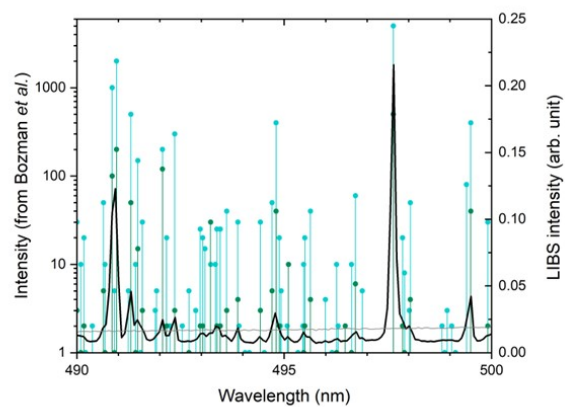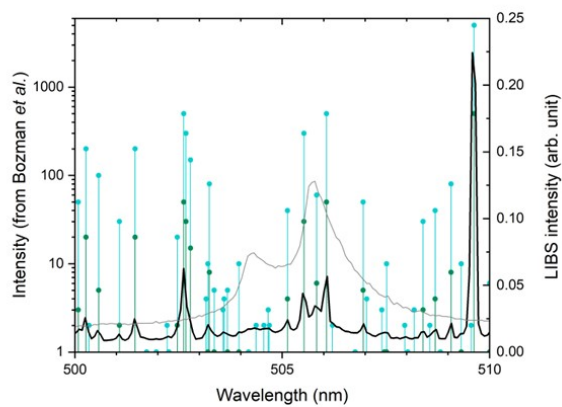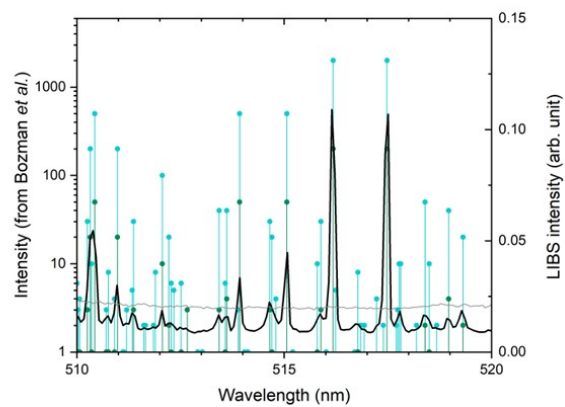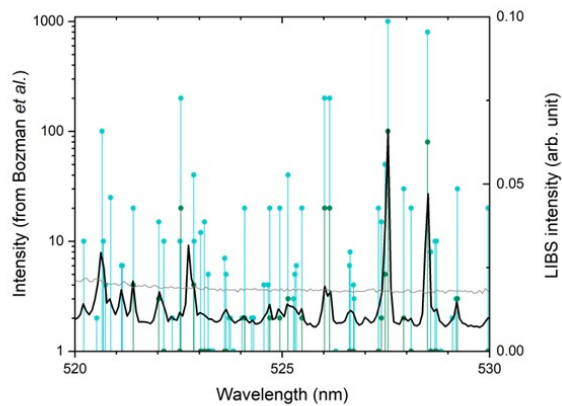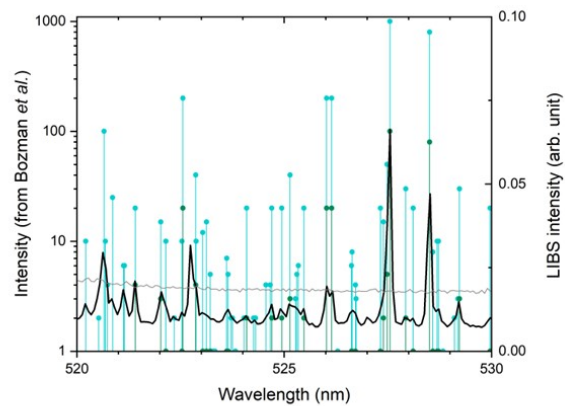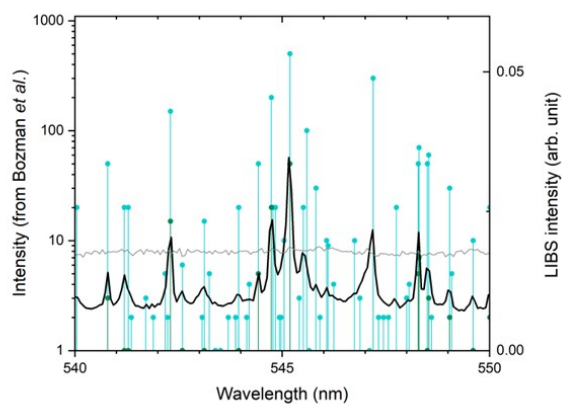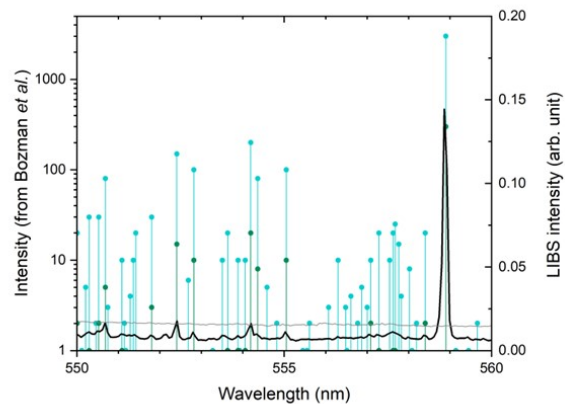

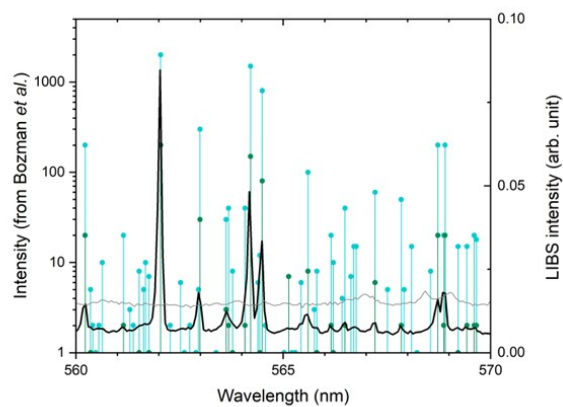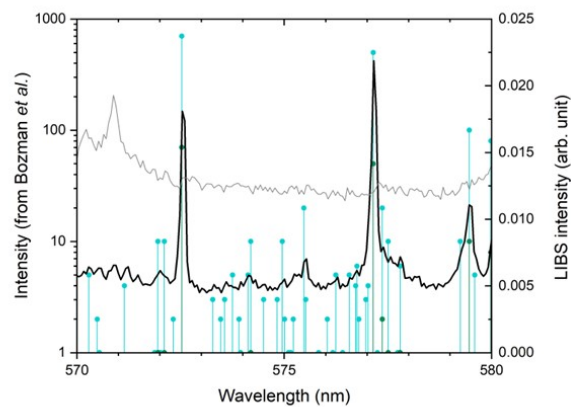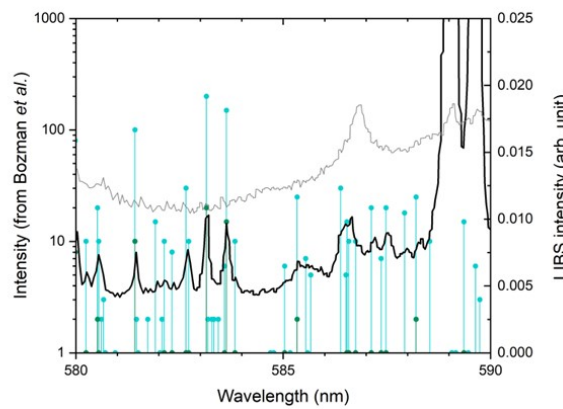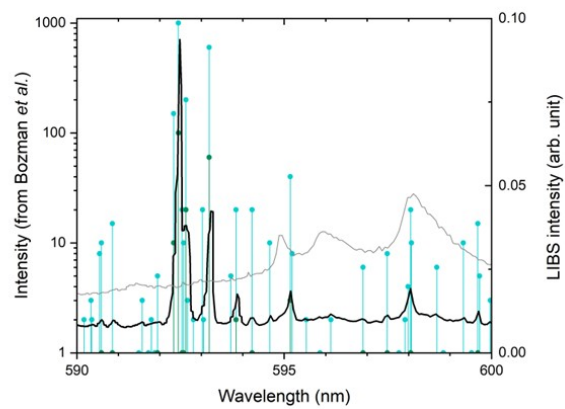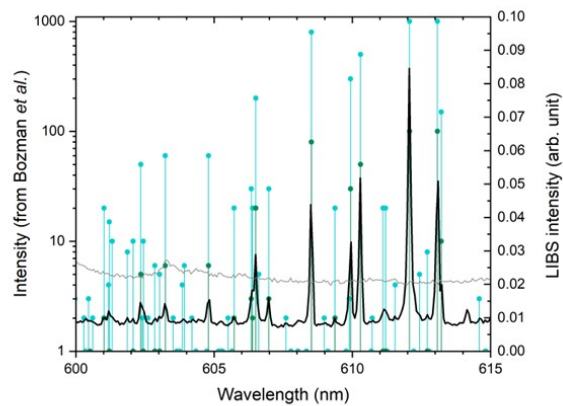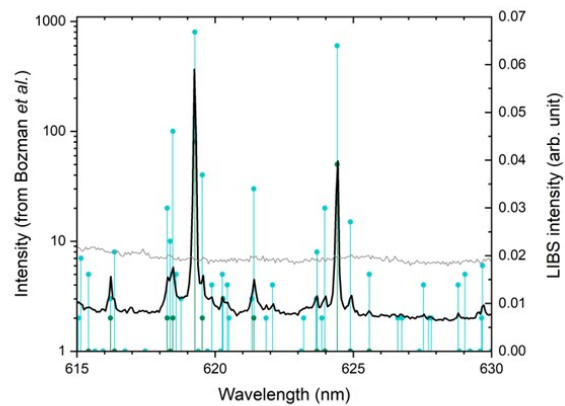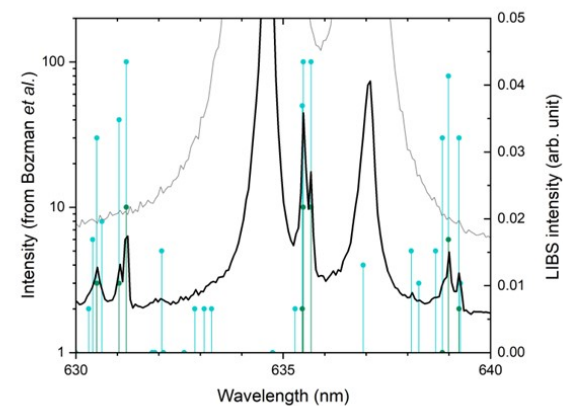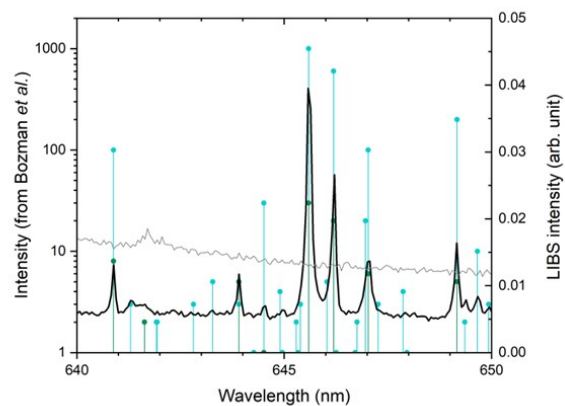

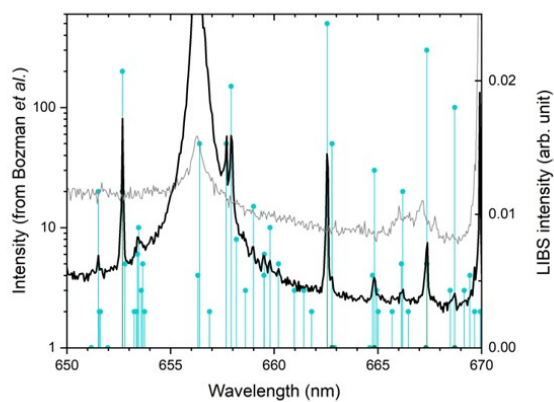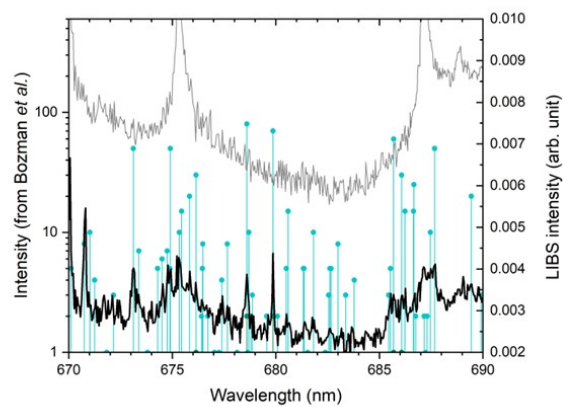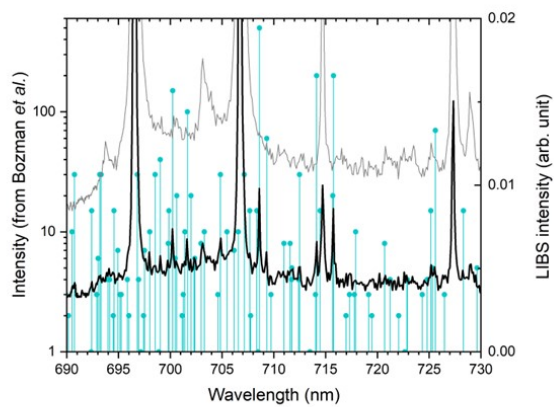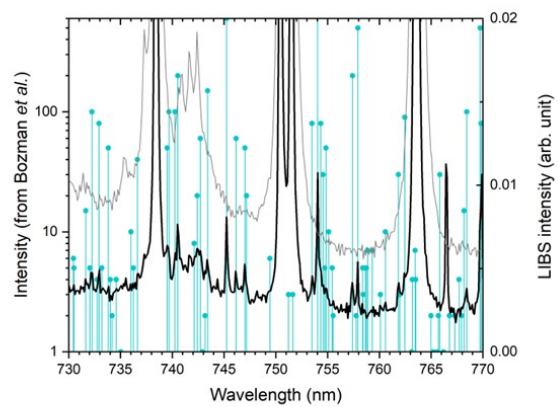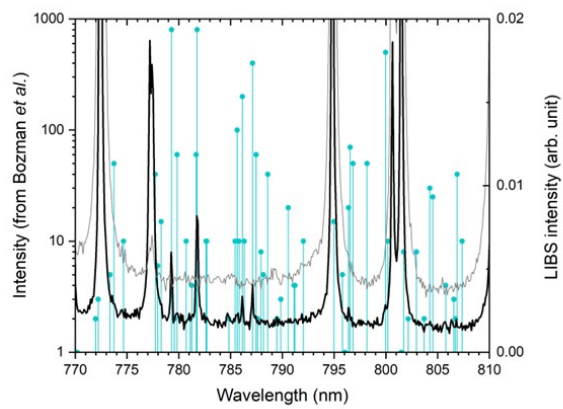

Supplement: d5ja00319a1.pdf [file d5ja00319a1.pdf]
